# Supplementary material for: Self-assembly synthesis, structure, topology, and magnetic properties of a mononuclear Fe(iii)-violurate derivative: a combined experimental and theoretical study
Source: Royal Society of Chemistry journal article supplement (doi:10.1039/c6dt03139k), 2016-01-01
Supplement: c6dt03139k1.pdf [file c6dt03139k1.pdf]

Electronic Supplementary Material (ESI) for Dalton Transactions.  
**This journal is © The Royal Society of Chemistry 2016**

### **Supplementary Information for manuscript:**

#### **Self-assembly synthesis, structure, topology, and magnetic properties of a mononuclear Fe(III)-violurate derivative: A combined experimental and theoretical study**

Rupak Banik,<sup>‡a</sup> Subhadip Roy,<sup>‡a</sup> Lubor Dlhán,<sup>b</sup> Ján Titiš,<sup>\*c</sup> Roman Boča,<sup>\*c</sup> Alexander M. Kirillov,<sup>\*d</sup> Adam D. Martin,<sup>e</sup> Antonio Bauza,<sup>f</sup> Antonio Frontera,<sup>\*f</sup> Antonio Rodríguez-Diéguez,<sup>g</sup> Juan M. Salas,<sup>g</sup> and Subrata Das<sup>\*h</sup>

*a. Department of Chemistry, National Institute of Technology (NIT) Agartala, Pin 799046, Tripura, India*

*b. Institute of Inorganic Chemistry, FCHPT, Slovak University of Technology, 81237 Bratislava, Slovakia*

*c. Department of Chemistry, FPV, University of SS Cyril and Methodius, 91701 Trnava, Slovakia. E-mail address: jan.titis@ucm.sk; roman.boca@stuba.sk*

*d. Centro de Química Estrutural, Complexo I, Instituto Superior Técnico, Universidade de Lisboa, Av. Rovisco Pais, 1049-001 Lisbon, Portugal. E-mail address: kirillov@tecnico.ulisboa.pt*

*e. School of Chemistry and the ARC Centre for Convergent Bio-Nano Science and Technology, The University of New South Wales, Sydney, Australia*

*f. Departament de Química, Universitat de les Illes Balears, Crta. de Valldemossa km 7.5, 07122 Palma de Mallorca (Balears), Spain. E-mail address: toni.frontera@uib.es*

*g. Departamento de Química Inorganica, Facultad de Ciencias, Universidad de Granada, 18071 Granada, Spain*

*h. Department of Chemistry, National Institute of Technology (NIT) Patna, Ashok Rajpath, Patna-800005, Bihar, India. E-mail address: subrataorgchem@gmail.com; Tel.: +917677417481*

## **Table of contents:**

### **1. Materials and methods**

### **2. Discussion of Hirshfeld surface analysis**

### **3. Figures S1-S7**

### **4. Tables S1 and S2**

### **5. References**

## **1. Materials and methods**

Synthetic reactions were performed in air. Violuric acid monohydrate was prepared using the synthetic method available in the literature.<sup>1</sup> All the other reagents were obtained from commercial sources and used without further purification. Elemental analyses (C, H and N) were performed using a Perkin-Elmer 2400 series II CHN analyzer. FT-IR spectrum was recorded on a Perkin-Elmer Spectrum 100 FT-IR spectrometer in KBr pellets. The DC magnetic data for **1** was taken by using the SQUID magnetometer (MPMS-XL7, Quantum Design) in the RSO mode of the detection. The susceptibility data was acquired at the applied field  $B_{DC} = 0.1$  T and the raw data was transformed to the effective magnetic moment. The magnetization was taken at  $T = 2.0$  and  $4.6$  K, respectively, and presented in the form of the magnetization per formula unit  $M_1 = M_{mol}/N_A\mu_B$ . The zero-field cooling magnetization and field cooling magnetization experiments (ZFCM/FCM) were conducted at the applied field of  $B = 10$  mT between  $2 - 100 - 2$  K. The hysteresis loop was cycled at  $T = 2.0$  and  $5.0$  K, respectively.

## **2. Discussion of Hirshfeld surface analysis**

Hirshfeld surface analysis was undertaken using *Crystal Explorer 3.1*.<sup>2</sup> The structure contains three violuric acid molecules coordinated to an Fe(III) centre in an octahedral manner. Four water molecules and one pyridine are also present in the crystal structure. The fingerprint plot shows two large spikes, pointing towards the bottom left of the plot (Fig. S2). These spikes represent O...H interactions, which make up 59.7% of the Hirshfeld surface

(Fig. S3). This suggests that the structure is dominated by hydrogen bonds, as has been stated before in structure description. This is supported by the lack of any spikes along the  $d_i = d_e$  diagonal, indicating no short H $\cdots$ H contacts (the proportion of H $\cdots$ H interactions is quite low, at only 8.1%, Fig. S4). Furthermore, no “wings” are observed on the fingerprint plot, which are often characteristic of C-H $\cdots$  $\pi$  interactions. These C $\cdots$ H interactions only make up 6.8% of the Hirshfeld surface, Fig. S5. Interestingly, although C $\cdots$ C interactions only comprise 3% of the surface, two distinct populations of these contacts are present on the Hirshfeld surface, with the closer contacts (further towards the bottom left) due to interactions between the ligand and neighbouring pyridine molecules (as mentioned in the manuscript), Fig. S6.

The three violuric acid ligands are distinct, in their coordination distances and their interactions. For the first violuric acid, defined by N31 and O31 as defined in the manuscript, there are a number of short, O $\cdots$ H based contacts. N32-H32 has a close contact with an adjacent O23 (highlighted in orange, Fig. S7a). The other N-H on the pyrimidine ring, N33-H33, displays a close contact with a water molecule, O2W (Fig. S7b, highlighted in orange). Both carbonyls have close contacts with neighbouring hydrogens – O32 closely contacts a hydrogen from O1W (highlighted in orange in Fig. S7a) and O33 displays a bifurcate interaction (highlighted in orange in Fig. S7b), with both N12-H12 and N23-H23, from different neighbouring molecules.

The second violuric acid ligand, defined by N21 and O21, also displays predominantly hydrogen bonding short interactions, however this ligand also interacts with the pyridine solvent. N22-H22 has a close contact with O3W (Fig. S7a, highlighted in green). As mentioned previously, N23-H23 interacts with a neighbouring O33. The O22 atom has a short contact with an adjacent N13-H13 (both highlighted in purple, Fig. S7b). O23 has a bifurcate interaction (like the analogous oxygen in the first ligand), except in this case it is with N32-H32 and also H5SA from the pyridine. This hydrogen from the pyridine also interacts with O24, which suggests it has an important role in stabilising the conformation of this violuric acid ligand.

The final violuric acid ligand is defined by the atoms N11 and O11 coordinated to the iron centre. N11-O14 displays a short contact with one of the protons from O1W. The other proton from O1W has a short contact with the next carbonyl on the ligand, O13. This carbonyl also has an interaction with a proton from O2W (circled in purple, Fig. S7a). Interestingly, all of the oxygen molecules at this position (O13, O23 and O33) show bifurcate interactions, suggesting that this is a key area for stabilising the geometry and arrangement of the structure. N13-H13 interacts with O22, as described previously (highlighted in purple,

Fig. S7a). O12 interacts with protons from two water molecules, O3W and O4W (highlighted in green, Fig. S7b). It should now be noted that this ligand has a much higher proportion of interactions with solvent molecules (in this case, water) than either of the other ligands. N12-H12 has a close contact with O33, described previously. The pyridine solvent molecule, aside from the close contacts which have previously been described, has close contact with a proton from O4W.

### 3. Figures

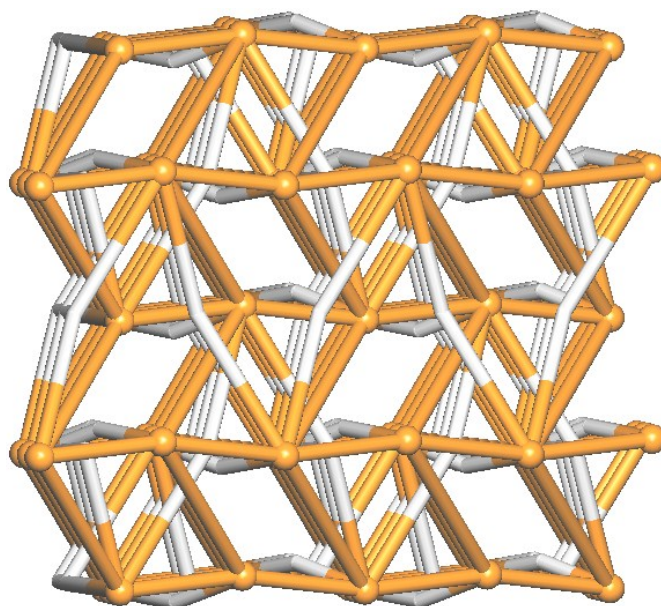

**Fig. S1** Topological representation of the 3D H-bonded network driven by strong H-bonds between  $[\text{Fe}(\text{H}_2\text{Vi})_3]$  units and crystallization  $\text{H}_2\text{O}$  molecules and showing a binodal 3,11-connected net with a unique topology defined by the point symbol of  $(3^6.4^{23}.5^{16}.6^9.7)(4^2.5)$ ; rotated view along the  $a$  axis; color codes: centroids of 11-connected  $[\text{Fe}(\text{H}_2\text{Vi})_3]$  molecular nodes (orange balls), centroids of 3-connected  $(\text{H}_2\text{O})_2$  nodes and 2-connected  $\text{H}_2\text{O}$  linkers (gray).

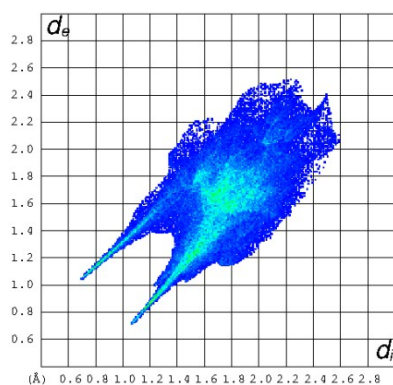

**Fig. S2** Full fingerprint plot for  $[\text{Fe}(\text{H}_2\text{Vi})_3]$ , displaying contacts from all interactions.

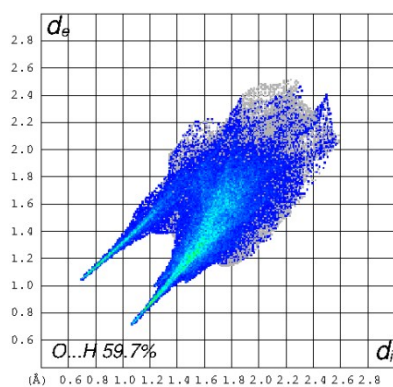

**Fig. S3** Fingerprint plot highlighting O...H interactions present within  $[\text{Fe}(\text{H}_2\text{Vi})_3]$ .

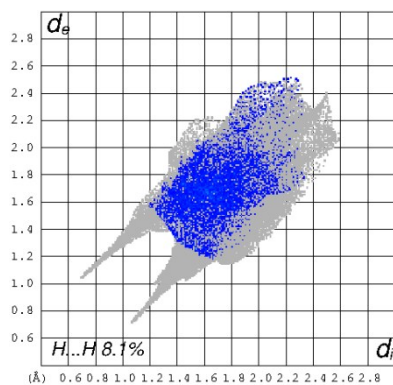

**Fig. S4** Fingerprint plot highlighting H...H interactions present within  $[\text{Fe}(\text{H}_2\text{Vi})_3]$ .

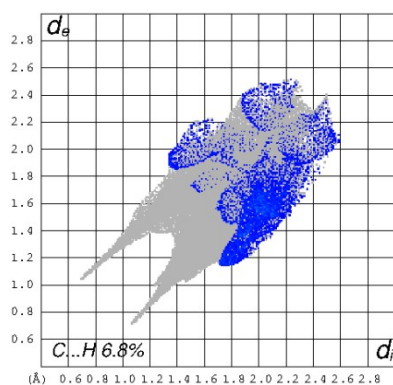

**Fig. S5** Fingerprint plot highlighting C...H interactions present within  $[\text{Fe}(\text{H}_2\text{Vi})_3]$ .

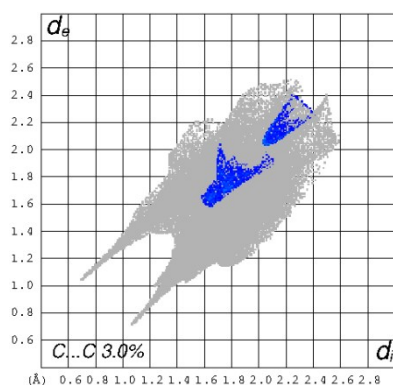

**Fig. S6** Fingerprint plot highlighting C...C interactions present within  $[\text{Fe}(\text{H}_2\text{Vi})_3]$ .

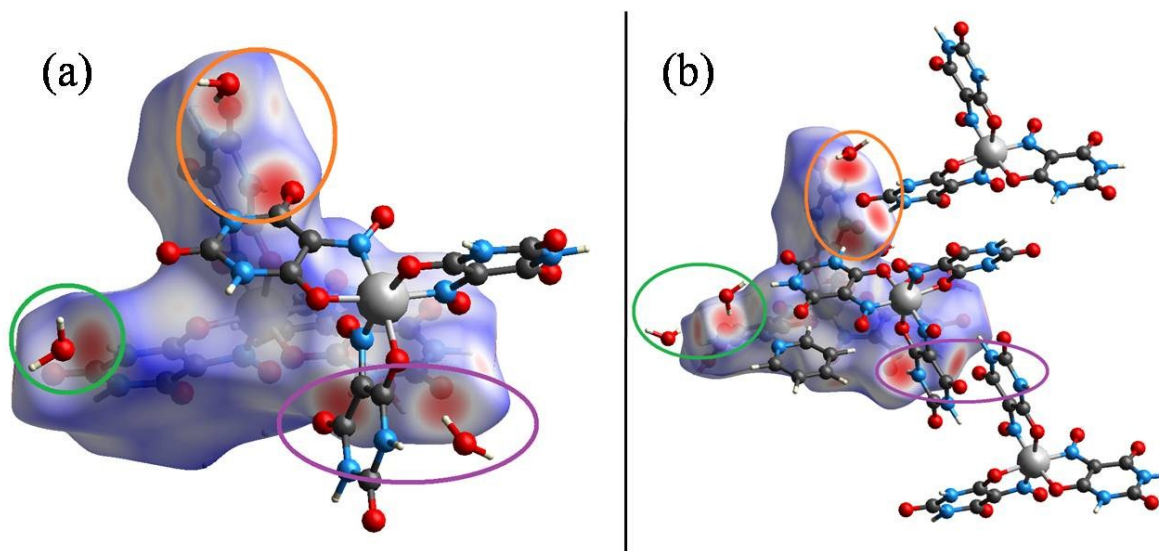

**Fig. S7** (a,b)  $d_{\text{norm}}$  surface of  $[\text{Fe}(\text{H}_2\text{Vi})_3]$ , showing close contacts for each of the coordinated violuric acid molecules, which interact with both neighbouring ligands and adjacent water molecules.

## 4. Tables

**Table S1.** Bond lengths for **1**.

| Atom | Atom | Length/Å   | Atom | Atom | Length/Å |
|------|------|------------|------|------|----------|
| Fe1  | O11  | 1.9858(13) | N22  | C21  | 1.352(2) |
| Fe1  | O21  | 1.9813(14) | N22  | C22  | 1.373(3) |
| Fe1  | O31  | 1.9991(15) | N23  | C22  | 1.362(3) |
| Fe1  | N11  | 1.8668(16) | N23  | C23  | 1.380(2) |
| Fe1  | N21  | 1.8702(16) | N31  | C34  | 1.369(3) |
| Fe1  | N31  | 1.8823(16) | N32  | C31  | 1.360(3) |
| O11  | C11  | 1.253(2)   | N32  | C32  | 1.375(3) |
| O12  | C12  | 1.216(2)   | N33  | C32  | 1.375(3) |
| O13  | C13  | 1.223(2)   | N33  | C33  | 1.380(3) |
| O14  | N11  | 1.250(2)   | C11  | C14  | 1.415(2) |
| O21  | C21  | 1.255(2)   | C13  | C14  | 1.435(2) |
| O22  | C22  | 1.213(2)   | C21  | C24  | 1.420(2) |
| O23  | C23  | 1.229(2)   | C23  | C24  | 1.437(2) |
| O24  | N21  | 1.248(2)   | C31  | C34  | 1.420(2) |
| O31  | C31  | 1.253(2)   | C33  | C34  | 1.429(3) |
| O32  | C32  | 1.214(3)   | C3S  | C4S  | 1.382(6) |
| O33  | C33  | 1.236(2)   | C3S  | C2S  | 1.366(6) |
| O34  | N31  | 1.249(2)   | C4S  | C5S  | 1.297(6) |
| N11  | C14  | 1.360(2)   | C5S  | C6S  | 1.328(5) |
| N12  | C11  | 1.356(2)   | C5S  | N6S  | 1.328(5) |
| N12  | C12  | 1.370(2)   | C6S  | N1S  | 1.351(5) |
| N13  | C12  | 1.363(3)   | N1S  | C2S  | 1.331(5) |
| N13  | C13  | 1.383(3)   | C2S  | C1S  | 1.331(5) |
| N21  | C24  | 1.369(2)   | C1S  | N6S  | 1.351(5) |

**Table S2.** Bond angles for **1**.

| Atom | Atom | Atom | Angle/°   | Atom | Atom | Atom | Angle/°    |
|------|------|------|-----------|------|------|------|------------|
| O11  | Fe1  | O31  | 85.76(6)  | O13  | C13  | C14  | 126.58(19) |
| O21  | Fe1  | O11  | 90.60(6)  | N13  | C13  | C14  | 113.39(16) |
| O21  | Fe1  | O31  | 89.81(6)  | N11  | C14  | C11  | 111.92(15) |
| N11  | Fe1  | O11  | 83.93(6)  | N11  | C14  | C13  | 126.94(16) |
| N11  | Fe1  | O21  | 173.47(7) | C11  | C14  | C13  | 121.07(16) |
| N11  | Fe1  | O31  | 93.33(7)  | O21  | C21  | N22  | 120.94(17) |
| N11  | Fe1  | N21  | 93.87(7)  | O21  | C21  | C24  | 120.56(16) |
| N11  | Fe1  | N31  | 94.92(7)  | N22  | C21  | C24  | 118.49(16) |
| N21  | Fe1  | O11  | 100.59(6) | O22  | C22  | N22  | 121.4(2)   |
| N21  | Fe1  | O21  | 83.61(6)  | O22  | C22  | N23  | 122.0(2)   |
| N21  | Fe1  | O31  | 170.86(6) | N23  | C22  | N22  | 116.61(16) |
| N21  | Fe1  | N31  | 90.46(7)  | O23  | C23  | N23  | 120.10(17) |

|     |     |     |            |     |     |     |            |
|-----|-----|-----|------------|-----|-----|-----|------------|
| N31 | Fe1 | O11 | 168.94(7)  | O23 | C23 | C24 | 126.28(17) |
| N31 | Fe1 | O21 | 91.13(7)   | N23 | C23 | C24 | 113.57(16) |
| N31 | Fe1 | O31 | 83.32(6)   | N21 | C24 | C21 | 111.56(15) |
| C11 | O11 | Fe1 | 108.70(11) | N21 | C24 | C23 | 126.83(16) |
| C21 | O21 | Fe1 | 108.63(11) | C21 | C24 | C23 | 120.85(15) |
| C31 | O31 | Fe1 | 109.58(12) | O31 | C31 | N32 | 121.01(16) |
| O14 | N11 | Fe1 | 125.98(13) | O31 | C31 | C34 | 120.92(19) |
| O14 | N11 | C14 | 120.35(16) | N32 | C31 | C34 | 118.07(18) |
| C14 | N11 | Fe1 | 113.65(12) | O32 | C32 | N32 | 122.19(19) |
| C11 | N12 | C12 | 123.31(16) | O32 | C32 | N33 | 121.9(2)   |
| C12 | N13 | C13 | 127.21(16) | N33 | C32 | N32 | 115.86(19) |
| O24 | N21 | Fe1 | 126.87(12) | O33 | C33 | N33 | 119.02(19) |
| O24 | N21 | C24 | 120.22(16) | O33 | C33 | C34 | 126.1(2)   |
| C24 | N21 | Fe1 | 112.63(12) | N33 | C33 | C34 | 114.91(16) |
| C21 | N22 | C22 | 122.91(16) | N31 | C34 | C31 | 111.86(17) |
| C22 | N23 | C23 | 126.94(17) | N31 | C34 | C33 | 127.26(16) |
| O34 | N31 | Fe1 | 126.31(14) | C31 | C34 | C33 | 120.84(18) |
| O34 | N31 | C34 | 119.87(17) | C2S | C3S | C4S | 119.4(3)   |
| C34 | N31 | Fe1 | 113.82(12) | C5S | C4S | C3S | 120.1(3)   |
| C31 | N32 | C32 | 124.02(16) | C4S | C5S | C6S | 120.7(4)   |
| C32 | N33 | C33 | 126.20(18) | C4S | C5S | N6S | 120.7(4)   |
| O11 | C11 | N12 | 120.38(15) | C5S | C6S | N1S | 120.9(3)   |
| O11 | C11 | C14 | 121.02(15) | C2S | N1S | C6S | 120.2(3)   |
| N12 | C11 | C14 | 118.58(15) | N1S | C2S | C3S | 118.8(4)   |
| O12 | C12 | N12 | 122.07(19) | C1S | C2S | C3S | 118.8(4)   |
| O12 | C12 | N13 | 121.95(18) | C2S | C1S | N6S | 120.2(3)   |
| N13 | C12 | N12 | 115.97(17) | C5S | N6S | C1S | 120.9(3)   |
| O13 | C13 | N13 | 120.01(17) |     |     |     |            |

---

## 5. References

- <sup>1</sup> N. A. Illán-Cabeza, A. R. García-García and M. N. Moreno-Carretero, *Inorg. Chim. Acta.*, 2011, **366**, 262-267.
- <sup>2</sup> S. K. Wolff, D. J. Grimwood, J. J. McKinnon, M. J. Turner, D. Jayatilaka and M. A. Spackman, CrystalExplorer (Version 3.1), University of Western Australia, 2012.
